# Supplementary material for: 4sUDRB-seq: measuring genomewide transcriptional elongation rates and initiation frequencies within cells
Source: PubMed Central journal article supplement (PMC4072947; doi:10.1186/gb-2014-15-5-r69), 2014-05-09

# Correlation of average signal over introns for all genes

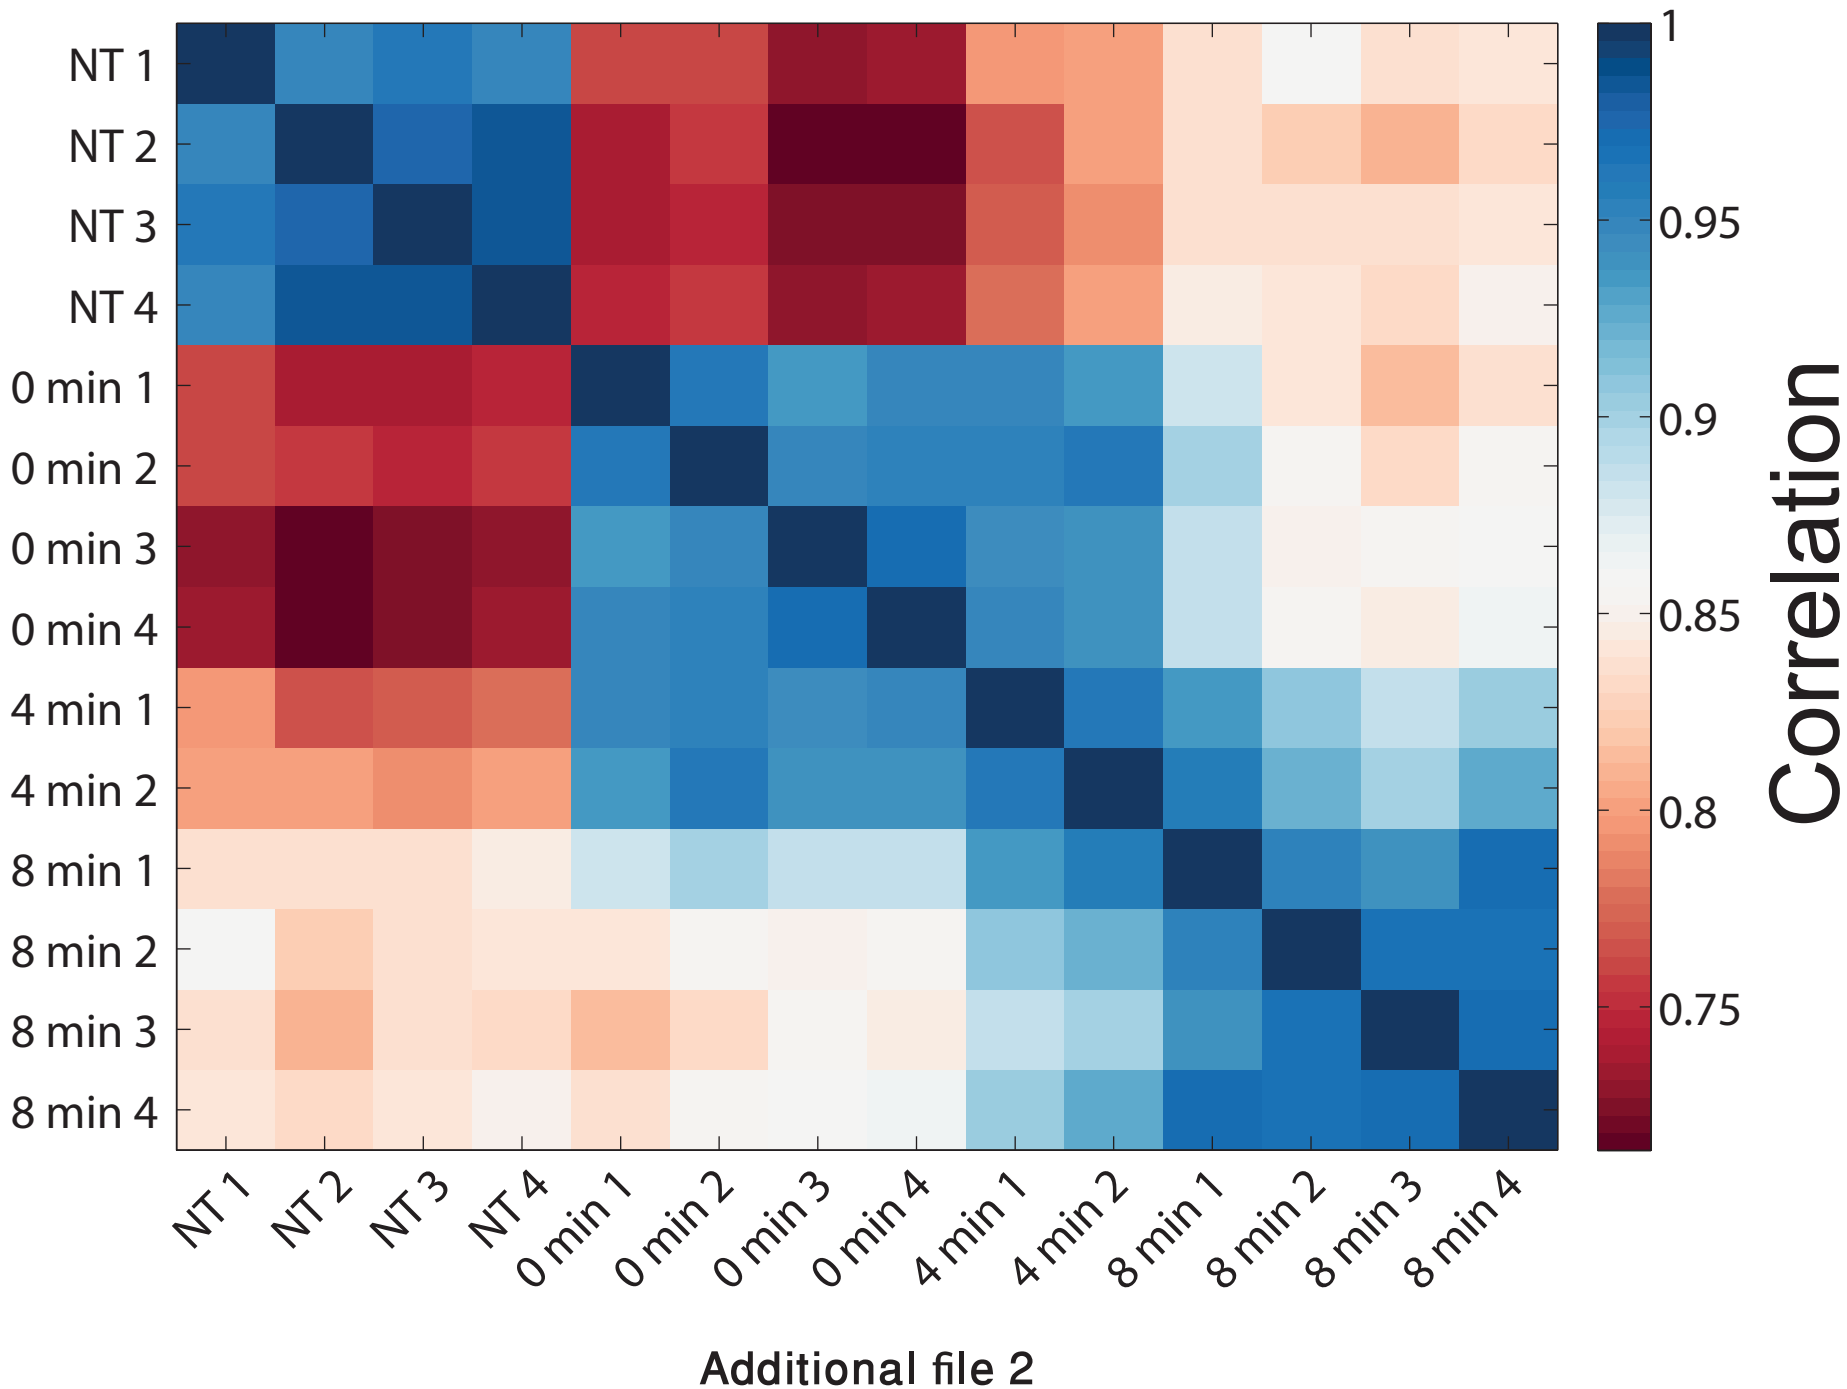

Supplement: gb-2014-15-5-r69-S2.pdf [file gb-2014-15-5-r69-S2.pdf]
